# Supplementary material
Source: PubMed Central journal article supplement (PMC9544866)
Supplement: OBY-30-129-s004.pdf [file OBY-30-129-s004.pdf]

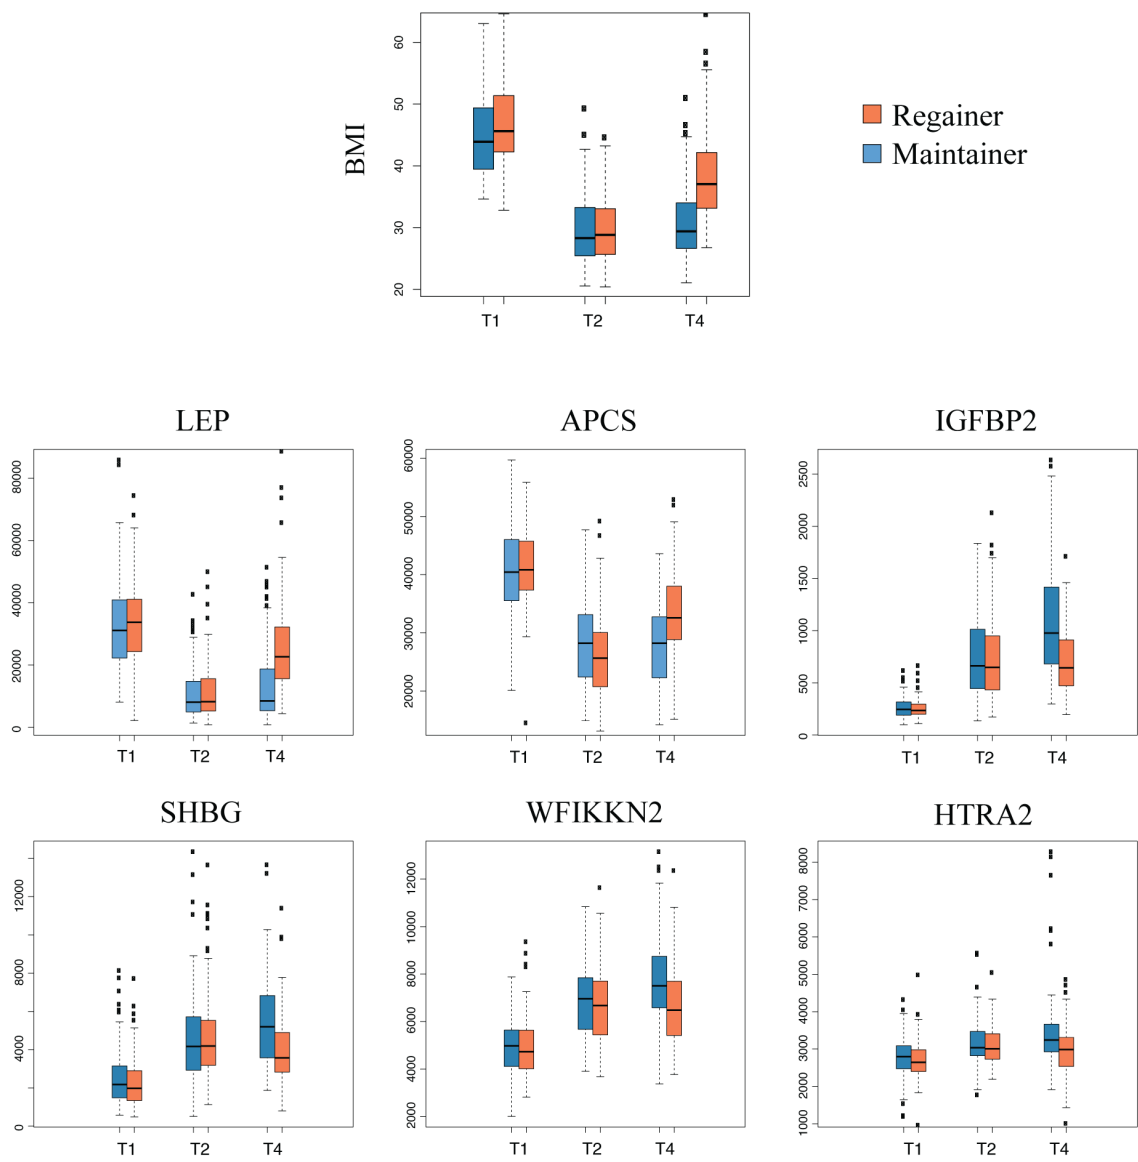

**Figure S1.** Boxplots at exams 1, 2 and 4 of BMI and the 6 proteins significantly different at exam 4 between subjects who maintained weight (blue, <10% of baseline weight regained from exam 2 to 4) and regained weight (red, >10% of baseline weight regained from exam 2 to 4).
